# Supplementary material for: Genetic engineering of Nannochloropsis oceanica to produce canthaxanthin and ketocarotenoids
Source: PubMed Central journal article supplement (PMC11606307; doi:10.1186/s12934-024-02599-4), 2024-11-29
Supplement: 12934_2024_2599_MOESM1_ESM.pdf [file 12934_2024_2599_MOESM1_ESM.pdf]

**Sequence of *CrBKT* gene optimized for *Nannochloropsis ostenia* expression.**

ATGGGCCCCGGGCATCCAGCCCACCTCCGCCCGCCCCTGCTCCCGCACCAAGCACTCCCGCT  
TCGCCCTCCTCGCCGCCGCCCTCACCGCCCGCCGCGTCAAGCAGTTCACCAAGCAGTTCCG  
CTCCCGCCGCATGGCCGAGGACATCCTCAAGCTCTGGCAGCGCCAGTACCACCTCCCCCGC  
GAGGACTCCGACAAGCGCACCTCCGCGAGCGGTCCACCTCTACCGCCCCCCCCGCTCCG  
ACCTCGGCGGCATCGCCGTCGCCGTCACCGTCATCGCCCTCTGGGCCACCCTCTTCGTCTAC  
GGCCTCTGGTTCGTCAAGCTCCCCTGGGCCCTCAAGGTCGGCGAGACCGCCACCTCCTGGG  
CCACCATCGCCGCCGTCTTCTTCTCCCTCGAATTTCTCTACACCGGCCTCTTCATCACCACCC  
ACGACGCCATGCACGGCACCATCGCCCTCCGCAACCGCCGCCTCAACGACTTCCTCGGCCA  
GCTCGCCATCTCCCTCTACGCCTGGTTCGACTACTCCGTCCTCCACCGCAAGCACTGGGAGC  
ACCACAACCACACCGGCGAGCCCCGCGTCGACCCCGACTTCCACCGCGGCAACCCCAACCT  
CGCCGTCTGGTTCGCCAGTTCATGGTCTCCTACATGACCCTCTCCCAGTTCCTCAAGATCGC  
CGTCTGGTCCAACCTCCTCCTCCTCGCCGGCGCCCCCTCGCCAACCAGTCTCCTTTCATGA  
CCGCCGCCCCATCCTCTCCGCCTTCCGCCTTTCTACTACGGCACCTACGTCCCCACCAC  
CCCGAGAAGGGCCACACCGGCGCCATGCCCTGGCAGGTCTCCCGCACCTCCTCCGCCTCCC  
GCCTCCAGTCTTCTCACCTGCTACCACTTCGACCTCCACTGGGAGCACCACCGCTGGCCC  
TACGCCCCCTGGTGGGAGCTCCCCAAGTGCCGCCAGATCGCCCGCGGCGCCGCCCTCGCC  
GGCTCCGGC

### Oligonucleotides used for this study.

| ID                   | Sequence                                         | Application                                                                                                     |
|----------------------|--------------------------------------------------|-----------------------------------------------------------------------------------------------------------------|
| CrBKTtot_fwd         | TTCTCCCGCACCCGCGGTGTTG<br>CGATGGGCCCCCGGCATCCAGC | Amplification of BKT from BKT<br>genestrand for construction of<br>pCcTE-BKT                                    |
| CrBKTtot_rev         | TCAGTGATGGTGATGGTGATGG<br>CCGCCGGAGCCGGCGAGGGC   | Amplification of BKT from BKT<br>genestrand for construction of<br>pCcTE-BKT                                    |
| pCpTE-Poll_fwd       | GGCCATCACCATCACCATCACT<br>GATG                   | Amplification of pCpTE<br>backbone from pCpTE-Poll for<br>construction of pCcTE-BKT                             |
| pCpTE-Poll_rev       | CGCAACACCGCGGGTGCG                               | Amplification of pCpTE<br>backbone from pCpTE-Poll for<br>construction of pCcTE-BKT                             |
| oCST033_fwd          | AGGTAAGGAGTAGGGAGGGG                             | Amplification of BKT construct<br>from pCpTE-BKT for<br>transformation                                          |
| oCST033_rev          | ATCCGCCGTCACACTAATCA                             | Amplification of BKT construct<br>from pCpTE-BKT for<br>transformation                                          |
| NoclRESControl_fwd   | AATGTGATTTCTGCCAGTG                              | Amplification of partial BKT<br>construct from pCpTE-BKT for<br>colony PCR and sequencing                       |
| Alpha-tub-Control_rv | TATGACGGGCACACACACAC                             | Amplification of partial BKT<br>construct from pCpTE-BKT for<br>colony PCR and sequencing                       |
| 3' Blast frw         | ACGTGTGGGAGAGCGCTTGA                             | Amplification of partial BKT<br>construct from <i>bkt</i><br>transformants gDNA to confirm<br>correct insertion |
| 3' chr. 3 rv         | TCTGCGGATGCTGCTACTTTCA                           | Amplification of partial BKT<br>construct from <i>bkt</i><br>transformants gDNA to confirm<br>correct insertion |

**Figure S1**

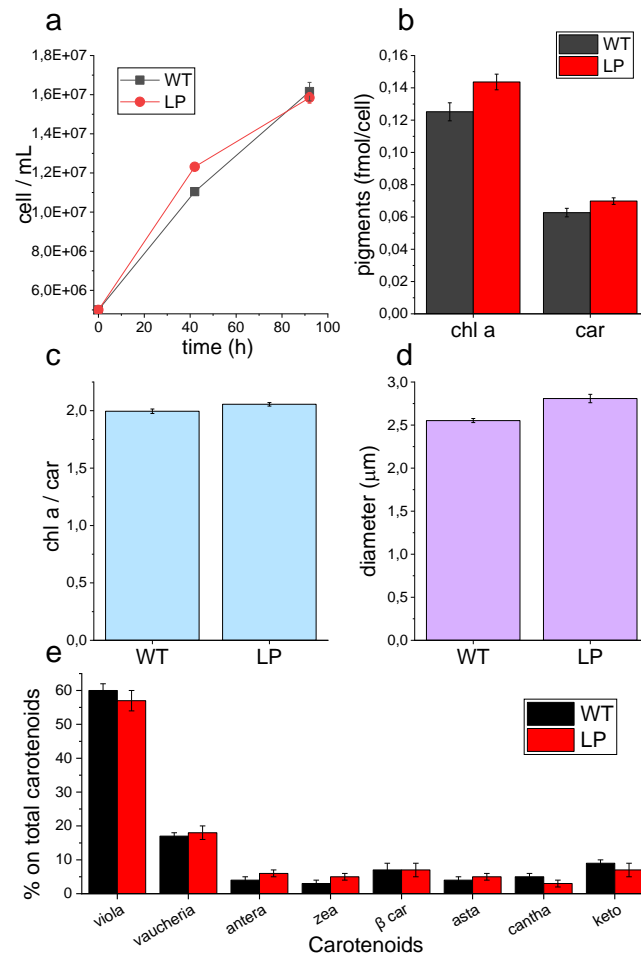

**Figure S1. Growth and pigment composition of wild-type and LP strains.** a) cell density at different points upon cultivation at  $80 \text{ } \mu\text{mol m}^{-2} \text{ s}^{-1}$  of wild-type (WT) and LP strain. b) cell diameter of WT and LP cells cultivated as in A. c) Chlorophyll a (chl a) and carotenoids (car) content per cells of WT and LP strain grown as reported in A. d) Chlorophyll to carotenoids ratio (chl a/car) calculated from the data reported in B. e) Distribution of the different carotenoid species in WT and LP strains as percentage on total carotenoid content. Viola: violaxanthin; vaucheria: vaucheriaxanthin; antera: anteraxanthin; zea: zeaxanthin;  $\beta$ -car:  $\beta$ -carotene; asta: astaxanthin; adonir: adonirubin; adonix: adonixanthin; cantha: canthaxanthin; total ketocarotenoids considering the values obtained for astaxanthin, adonirubin, adonixanthin and canthaxanthin. Data are expressed as means  $\pm$  standard deviation ( $n=3$ ). The values reported are not significantly different as evaluated by using a two-sided Student's t-test.

Figure S2

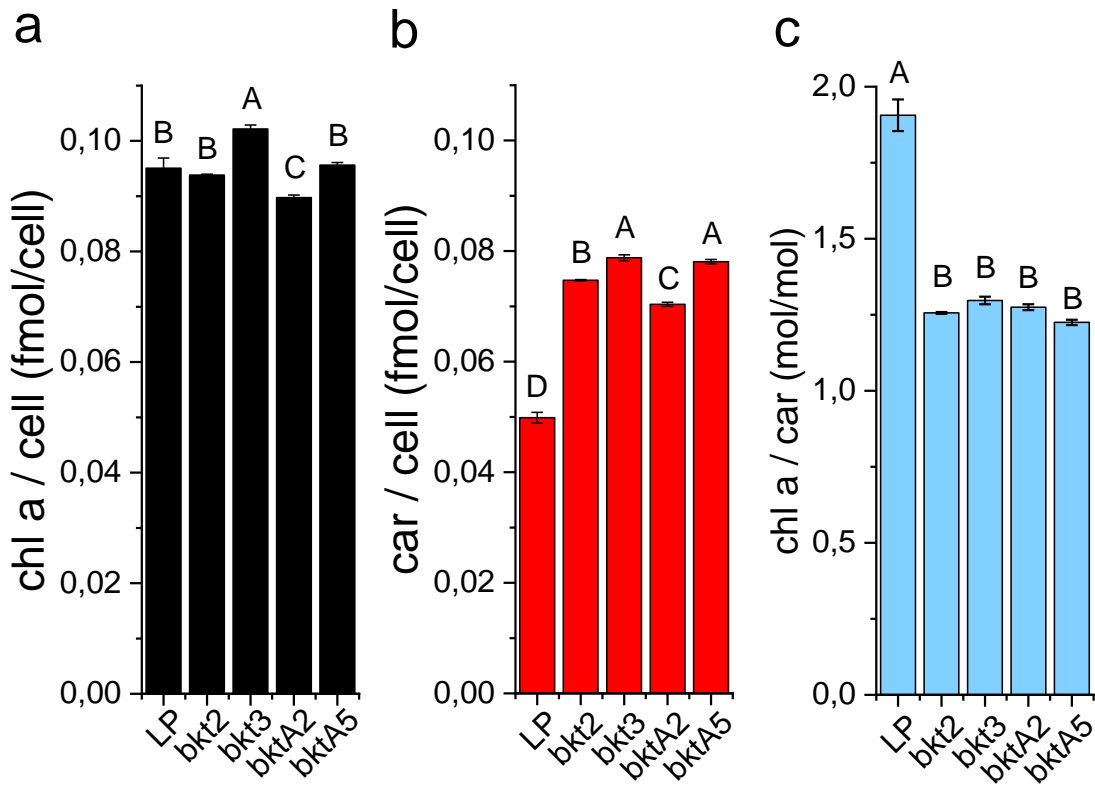

**Figure S2. Pigment composition of LP and *bkt* strains.** a) Chlorophyll a (chl a) and b) carotenoids (car) content per cells of LP and *bkt* strains. c) Chlorophyll to carotenoids ratio (chl a/car) calculated from the data reported in a) and b). Data are expressed as means  $\pm$  standard deviation (n=2). Significantly different values are indicated with different letters.

Figure S3

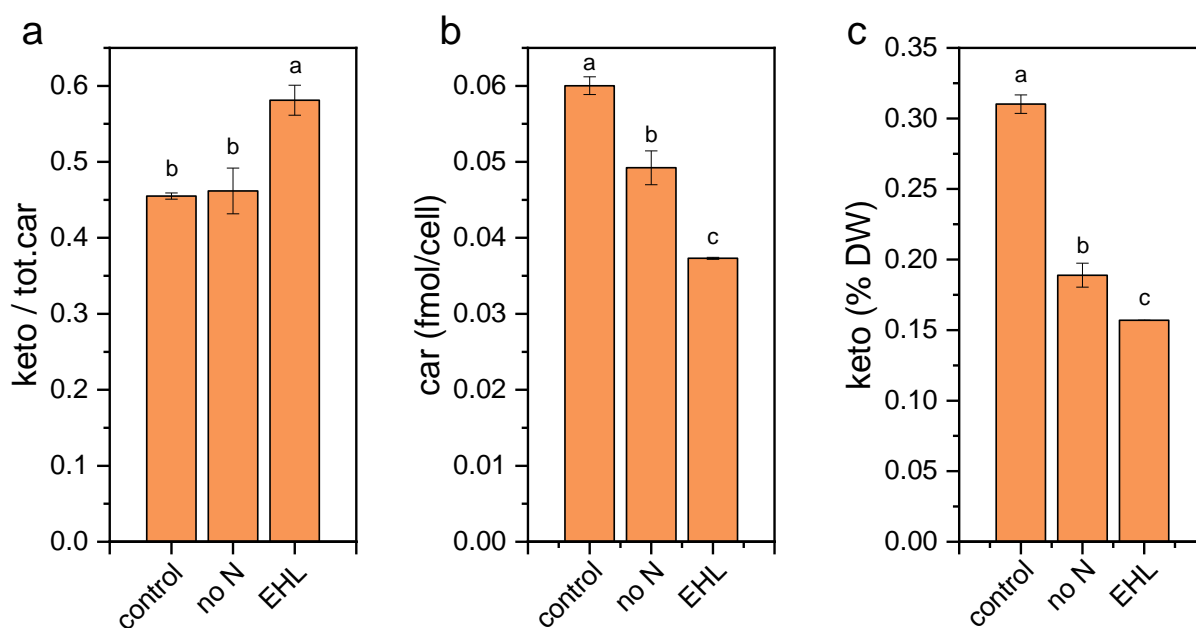

**Figure S3. Ketocarotenoid and carotenoid content upon N and high light stress.** Cells grown at  $150 \mu\text{mol m}^{-2}\text{s}^{-1}$  for 10 days as reported in Figure 5 were centrifuged and resuspended in a medium without nitrogen or exposed at extreme high light ( $3000 \mu\text{mol m}^{-2}\text{s}^{-1}$ ) for two days then pigment composition was analysed. Data are expressed as means  $\pm$  standard deviation ( $n=3$ ). Significantly different values are indicated with different letters.

**Table S1. Pigment analysis of *bkt* lines compared to *LP* background.** Raw data for chlorophyll (chl) and carotenoid (car) content per cell and chl/car ratio reported in the main text for *LP* and *bkt* strains (Table 1). *bkt2*, *bkt3*, *bktA2* and *bktA5* are different transformed lines expressing CrBKT enzyme.

|         | chl a<br>(fmol/cell) | car<br>(fmol/cell) | chl/car |
|---------|----------------------|--------------------|---------|
| LP.1    | 0.093                | 0.049              | 1.909   |
| LP.2    | 0.097                | 0.051              | 1.903   |
| bkt2.1  | 0.093                | 0.074              | 1.255   |
| bkt2.2  | 0.095                | 0.075              | 1.257   |
| bkt3.1  | 0.103                | 0.079              | 1.295   |
| bkt3.2  | 0.102                | 0.078              | 1.299   |
| bktA2.1 | 0.091                | 0.071              | 1.276   |
| bktA2.2 | 0.088                | 0.069              | 1.274   |
| bktA5.1 | 0.095                | 0.077              | 1.227   |
| bktA5.2 | 0.097                | 0.079              | 1.223   |

**Table S2. Carotenoids distribution in *bkt* lines compared to *LP* background.** Raw data for different carotenoid content on total carotenoids reported in the main text for *LP* and *bkt* strains (Table 1). *bkt2*, *bkt3*, *bktA2* and *bktA5* are different transformed lines expressing CrBKT enzyme. Carotenoid content is expressed as carotenoid on total carotenoids (mol/mol). viola: violaxanthin; vau: vaucherixanthin; antera: anteraxanthin; zea: zeaxanthin;  $\beta$ -car:  $\beta$ -carotene; asta: astaxanthin; adonir: adonirubin; adonix: adonixanthin; cantha: canthaxanthin; keto: ketocarotenoids.

|      | carotenoids / total carotenoids (mol/mol) |       |       |        |       |        |        |        |             |       |
|------|-------------------------------------------|-------|-------|--------|-------|--------|--------|--------|-------------|-------|
|      | viola                                     | asta  | vau   | antera | zea   | cantha | adonir | adonix | $\beta$ car | keto  |
| LP.1 | 0.551                                     | 0.054 | 0.184 | 0.057  | 0.051 | 0.031  | 0.000  | 0.000  | 0.072       | 0.085 |
| LP.2 | 0.591                                     | 0.036 | 0.184 | 0.057  | 0.044 | 0.022  | 0.000  | 0.000  | 0.066       | 0.058 |
| bkt2 | 0.286                                     | 0.080 | 0.131 | 0.057  | 0.000 | 0.258  | 0.144  | 0.000  | 0.044       | 0.481 |
| bkt3 | 0.280                                     | 0.089 | 0.113 | 0.050  | 0.000 | 0.254  | 0.136  | 0.023  | 0.056       | 0.501 |

**Table S3 Chlorophyll and carotenoid content at different light intensities.** Pigment content was determined in cells grown in air-lifted photobioreactors at different light intensities (150, 600, 1200  $\mu\text{mol m}^{-2}\text{s}^{-1}$ ) in ASW medium for 7-11 days . Chlorophyll and carotenoids per cell are expressed as femtomole (fmol). Chl a: chlorophyll a; Car: carotenoids.

|             | Chl a<br>(fmol/cell) | Car<br>(fmol/cell) |
|-------------|----------------------|--------------------|
| LP 150.1    | 0.079                | 0.044              |
| LP 150.2    | 0.081                | 0.046              |
| LP 150.3    | 0.046                | 0.031              |
| LP 150.4    | 0.067                | 0.040              |
| LP 600.1    | 0.020                | 0.021              |
| LP 600.2    | 0.021                | 0.022              |
| LP 600.3    | 0.008                | 0.012              |
| LP 600.4    | 0.010                | 0.014              |
| LP 1200.1   | 0.012                | 0.016              |
| LP 1200.2   | 0.012                | 0.017              |
| LP 1200.3   | 0.008                | 0.012              |
| LP 1200.4   | 0.008                | 0.012              |
| bkt2 150.1  | 0.060                | 0.046              |
| bkt2 150.2  | 0.046                | 0.042              |
| bkt2 150.3  | 0.113                | 0.069              |
| bkt2 150.4  | 0.112                | 0.070              |
| bkt3 150.5  | 0.101                | 0.066              |
| bkt3 150.6  | 0.098                | 0.064              |
| bkt2 600.1  | 0.015                | 0.022              |
| bkt2 600.2  | 0.015                | 0.023              |
| bkt2 600.3  | 0.027                | 0.026              |
| bkt2 600.4  | 0.028                | 0.027              |
| bkt3 600.5  | 0.028                | 0.029              |
| bkt3 600.6  | 0.028                | 0.030              |
| bkt2 1200.1 | 0.001                | 0.010              |
| bkt2 1200.2 | 0.001                | 0.010              |
| bkt2 1200.3 | 0.013                | 0.016              |
| bkt2 1200.4 | 0.014                | 0.017              |
| bkt3 1200.5 | 0.004                | 0.014              |

|             |       |       |
|-------------|-------|-------|
| bkt3 1200.6 | 0.005 | 0.015 |
|-------------|-------|-------|

**Table S4 Carotenoid distribution at different light intensities.** Pigment content was determined in cells grown in air-lifted photobioreactors at different light intensities (150, 600, 1200  $\mu\text{mol m}^{-2}\text{s}^{-1}$ ) in ASW medium for 7-11 days. Carotenoids are expressed as carotenoid on total carotenoids (mol/mol). Car: carotenoids; viola: violaxanthin; vaucheria: vaucheriaxanthin; antera: anteraxanthin; zea: zeaxanthin;  $\beta$ -car:  $\beta$ -carotene; asta: astaxanthin; adonir: adonirubin; adonix: adonixanthin; cantha: canthaxanthin; keto: ketocarotenoids.

|            | carotenoids/total carotenoids (mol/mol) |       |        |       |       |       |        |        |        |       |
|------------|-----------------------------------------|-------|--------|-------|-------|-------|--------|--------|--------|-------|
|            | viola                                   | vau   | antera | zea   | b car | asta  | adonir | adonix | cantha | keto  |
| LP 150.1   | 0.535                                   | 0.273 | 0.048  | 0.030 | 0.059 | 0.037 | 0.000  | 0.000  | 0.018  | 0.055 |
| LP 150.2   | 0.525                                   | 0.252 | 0.040  | 0.031 | 0.061 | 0.053 | 0.000  | 0.000  | 0.037  | 0.090 |
| LP 600.1   | 0.441                                   | 0.200 | 0.070  | 0.065 | 0.054 | 0.122 | 0.000  | 0.000  | 0.048  | 0.170 |
| LP 600.2   | 0.389                                   | 0.162 | 0.072  | 0.064 | 0.058 | 0.177 | 0.000  | 0.000  | 0.077  | 0.254 |
| LP 1200.1  | 0.371                                   | 0.150 | 0.075  | 0.089 | 0.068 | 0.166 | 0.000  | 0.000  | 0.082  | 0.248 |
| LP 1200.2  | 0.401                                   | 0.153 | 0.054  | 0.070 | 0.047 | 0.182 | 0.000  | 0.000  | 0.093  | 0.275 |
| bkt 150.1  | 0.303                                   | 0.145 | 0.040  | 0.000 | 0.039 | 0.083 | 0.058  | 0.045  | 0.286  | 0.473 |
| bkt 150.2  | 0.310                                   | 0.164 | 0.040  | 0.000 | 0.035 | 0.091 | 0.067  | 0.066  | 0.227  | 0.451 |
| bkt 600.1  | 0.355                                   | 0.162 | 0.042  | 0.000 | 0.022 | 0.078 | 0.060  | 0.047  | 0.234  | 0.419 |
| bkt 600.2  | 0.262                                   | 0.134 | 0.041  | 0.000 | 0.026 | 0.085 | 0.081  | 0.075  | 0.296  | 0.537 |
| bkt 1200.1 | 0.283                                   | 0.203 | 0.101  | 0.000 | 0.008 | 0.150 | 0.042  | 0.022  | 0.192  | 0.405 |
| bkt 1200.2 | 0.366                                   | 0.142 | 0.059  | 0.000 | 0.012 | 0.118 | 0.042  | 0.046  | 0.216  | 0.421 |
